# Supplementary material for: Ecology and Demography of Free-Roaming Domestic Dogs in Rural Villages near Serengeti National Park in Tanzania
Source: PubMed Central journal article supplement (PMC5125679; doi:10.1371/journal.pone.0167092), 2016-11-28
Supplement: pone.0167092.s001.pdf [file pone.0167092.s001.pdf]

**DODOSO LA UCHUNGUZI WA KICHAA CHA MBWA**

- 1.Date.....2.Village Buyubi Iyogelo Nangale Sanungu 5.GPS.....  
 3. Subvillage..... 4. District: Maswa Bariadi 5.GPS.....  
 6.Interviewer.....7.Head of hh.....8.Subvillage leader.....  
 9.Tribe .....10.Religion.....specify.....11c. Language: Swahili Sukuma  
 11.House type: mud/grass mud/iron brick/grass brick/iron other:..... 11b. Choo? Yes No  
 12.Total no. people in household.....No. Children (<18yrs)..... 11d. HHscore: 1 2 3  
 13.Highest level of education: none primary secondary technical university

**Maelezo ya mbwa, chanjo na utoaji damu:**

- 14.Total no. dogs in household..... Dogs less than 6 mths ..... Dogs above 6 mths ..... Total Vacc'd.....  
 15.Total no. cats in household..... Cats less than 6 mths..... Cats above 6 mths..... Total Vacc'd.....

**Table A: Information on Household's Current Dogs**

| Name of dog | ID# | Sex | Age mo owner | Age mo interv. | Vacc (y/n) | Vacc ever | Vacc card | Vacc mark | Where got dog? | Time owned |
|-------------|-----|-----|--------------|----------------|------------|-----------|-----------|-----------|----------------|------------|
|             |     |     |              |                |            |           |           |           |                |            |
|             |     |     |              |                |            |           |           |           |                |            |
|             |     |     |              |                |            |           |           |           |                |            |
|             |     |     |              |                |            |           |           |           |                |            |
|             |     |     |              |                |            |           |           |           |                |            |

**Table B: Information on Household's Current Cats**

| Name of cat | ID# | Sex | Age (mos) from owner | Age (mos) int | Cat vacc? (Y/ N) | Where did you get this Cat? | How long owned? |
|-------------|-----|-----|----------------------|---------------|------------------|-----------------------------|-----------------|
|             |     |     |                      |               |                  |                             |                 |
|             |     |     |                      |               |                  |                             |                 |

- 16a.Dogs vaccinated? Yes No Control zone  
 16b. If not vacc'd, why? Too busy out of town boys not available did not hear other:.....  
 16c. In vacc villages, why do you vaccinate your dogs?.....  
 17a. Has there been any problem with your dog/cat after vaccination? Yes/ No.  
 b. If yes describe.....  
 18.What is the role of your dog(s) (circle): companion protection hunting herding Other:.....  
 19.If you use your dog for protection, protection from: people wildlife other:.....  
 20.What does your dog bark at? People other dogs wild animals other:.....  
 21.What is the role of your cat(s) (circle): companion rodent control Other:.....

22a. Ideally, how many **dogs** would you want? (circle):    A. 1-2    B. 3-4    C. 5-6    D. 7-8    E. 9+

b. Why?    home/livestock security    I like dogs    Other:.....

23a. Do you think there are problems with having many dogs in your **household**? (circle)    Yes    No

b. If yes, why?    Food shortage    fighting    other:.....

24a. Do you think there have been changes in the village dog population in the last two years? (circle)    Yes    No

b. If the answer is yes, what type of change? (circle)    Increase    Decrease

25a. Do you think the change in dog population is causing any problem? (circle)    Yes    No

b. If yes, why? .....

c. If you think dog population changes are a problem in this village, what measures should be taken to mitigate the problem?.....

d. If you think the dog population changes are **not** a problem in this village, why do you think so?  
.....

26. Have you used any measures to control number of dogs you have in the last 2 years? (circle)    Yes    No

**Table C: Methods of Population Control (Ask owners what methods of population control they have used in the past, are willing to consider if population growth is undesirable for both dogs and cats).**

| Control Method          |            | Used in past |    | Using currently |    | Willing to consider using |    |
|-------------------------|------------|--------------|----|-----------------|----|---------------------------|----|
|                         |            | Yes          | No | Yes             | No | Yes                       | No |
| Giving away/selling     | Pups       |              |    |                 |    |                           |    |
|                         | Adult dogs |              |    |                 |    |                           |    |
| Killing                 | Pups       |              |    |                 |    |                           |    |
| Confining/tying up      | Males      |              |    |                 |    |                           |    |
|                         | Females    |              |    |                 |    |                           |    |
| Surgical Sterilization  | Males      |              |    |                 |    |                           |    |
|                         | Females    |              |    |                 |    |                           |    |
| Contraceptive Injection | Males      |              |    |                 |    |                           |    |
|                         | Females    |              |    |                 |    |                           |    |
| OTHER:                  |            |              |    |                 |    |                           |    |

26e. If no to killing pups, ask: why not kill pups to reduce the number of unwanted pups? (circle)

People need dogs    It is not good to kill    I like puppies    Other:.....

27a. Have you acquired any dogs/puppies since the last questionnaire day? (circle)    Yes    No

b. How many? ..... If the answer is yes, verify dogs are listed in table A.

28a. Have any dogs or puppies died since the last questionnaire day? (circle)    Yes    No

**b.** How many? ..... If the answer is yes, fill in Table D on next page....

**Table D: Mortality/ Disappearance/Sick Data of Previously Recorded Dogs**

| Name of Dog | ID# | Sex | Death age(mos) | Month died/missing | Cause of death | If died, what clinical signs? |
|-------------|-----|-----|----------------|--------------------|----------------|-------------------------------|
|             |     |     |                |                    |                |                               |
|             |     |     |                |                    |                |                               |
|             |     |     |                |                    |                |                               |
|             |     |     |                |                    |                |                               |
|             |     |     |                |                    |                |                               |

- 29a. Is there any dog which fell sick in the last 12 months? (circle)      Yes      No
- b. If yes, which dog and describe: .....
- c. What did you do with the sick dog?    Nothing    Used local herbs    treated by livestock officer    killed dog    Other
- d. Did dog change behavior?    Yes    No      If dog changed behavior describe the behavior change:  
 .....
- e. Do you think dog which fell sick had rabies? (circle)      Yes      No  
 If yes, why? .....
- f. Was the dog bitten by another animal? (circle)    Yes    No  
 If yes, which animal bit the sick dog .....
- g. If it was a dog, indicate the name of the dog, if known.....  
 And indicate the name of the owner, if known.....  
 What happened to the animal which bit your dog? Describe:.....
- 30a. Where does your dog sleep?    Inside home      inside boma (but outside house)      Outside boma gate  
 Other? \_\_\_\_\_
- 30b. How often does your dog sleep in same room with children/family?    Never    2-3 times weekly    everyday
- 30c. Does your dog ever clean your child (by licking)?    Yes    No
- 30d. How many days a week does your dog eat feces?    never    1-2    3-4    5-6    everyday
- 30e. How many times in an average week do you feed your **dog**? (circle):  
 Never    1-2    3-4    5-6    everyday
- 30f. Does this change at different times in the year?    Yes    No      If yes, How? .....
- 30g. Who feeds/takes the dog?.....Age.....Sex:    male    female
- 30h. Do you spray your dog for fleas/ticks?    Yes    No    If yes, what do you use:.....
- 30i. Do you bathe your dog?    Yes    No    How often?.....With what?.....

**Table E: Dietary Info (Ask what do you feed your dog? check all that apply)**

| Food              | Dog eats: | Frequency |        |          | Other? |
|-------------------|-----------|-----------|--------|----------|--------|
|                   | yes       | monthly   | weekly | everyday |        |
| ugali             |           |           |        |          |        |
| rice              |           |           |        |          |        |
| millet            |           |           |        |          |        |
| potatoes          |           |           |        |          |        |
| chicken           |           |           |        |          |        |
| beef              |           |           |        |          |        |
| goat              |           |           |        |          |        |
| dagaa             |           |           |        |          |        |
| milk              |           |           |        |          |        |
| egg               |           |           |        |          |        |
| rats              |           |           |        |          |        |
| Fruit(specify)    |           |           |        |          |        |
| Veggies (specify) |           |           |        |          |        |

31e. Does your dog ever kill its own food? Yes No If yes, what does it kill?.....

32a. Do you own livestock? Yes No If yes, how many livestock do you have? Fill in table below

**Table F: Livestock Data**

| Cattle |       | Goats |       | Sheep |       | Donkeys |       | Chicken |       |
|--------|-------|-------|-------|-------|-------|---------|-------|---------|-------|
| >6mos  | <6mos | >6mos | <6mos | >6mos | <6mos | >6mos   | <6mos | >6mos   | <6mos |
|        |       |       |       |       |       |         |       |         |       |

33. Has any female dog reproduced this year? Yes No

**Table H: Female Dog Reproduction Data (Ask for each adult female in Table A)**

| Name of female | ID number | No. of litters in lifetime? | No. litters this yr? | Month(s) whelped | Total Pups |
|----------------|-----------|-----------------------------|----------------------|------------------|------------|
|                |           |                             |                      |                  |            |
|                |           |                             |                      |                  |            |
|                |           |                             |                      |                  |            |

**Table I: Female Dog Reproduction – Litter Details**

| Mother ID # | Litter month | # pups born |   | # living in house |   | # pups died/ disappeared |   | # pups given away |   |
|-------------|--------------|-------------|---|-------------------|---|--------------------------|---|-------------------|---|
|             |              | F           | M | F                 | M | F                        | M | F                 | M |
|             |              |             |   |                   |   |                          |   |                   |   |
|             |              |             |   |                   |   |                          |   |                   |   |
|             |              |             |   |                   |   |                          |   |                   |   |

33d. If pups died, what was the cause of death? .....

Were pups killed by owner; if yes, why? .....

If pups given away, ask why? .....

Do you prefer to keep one sex over the other? (circle) Yes No Female Male

If yes, why? .....

34. Have you seen non-domestic animals in the village in past year? Yes No Please check table below:

| Species       | Yes | How often do you see these? |        |          | Other |
|---------------|-----|-----------------------------|--------|----------|-------|
|               |     | Monthly                     | Weekly | Everyday |       |
| Lion          |     |                             |        |          |       |
| Hyena         |     |                             |        |          |       |
| Leopard       |     |                             |        |          |       |
| Jackal        |     |                             |        |          |       |
| Wildcat       |     |                             |        |          |       |
| Mongoose      |     |                             |        |          |       |
| Bat eared fox |     |                             |        |          |       |
| Wildebeest    |     |                             |        |          |       |
| Impala        |     |                             |        |          |       |
| Buffalo       |     |                             |        |          |       |
| Porcupine     |     |                             |        |          |       |
| Dik dik       |     |                             |        |          |       |
| Springhare    |     |                             |        |          |       |
| Baboon        |     |                             |        |          |       |
| Vervets       |     |                             |        |          |       |
| Snake         |     |                             |        |          |       |

34a. How many times has livestock been killed by wildlife since last visit?.....

b. What animal killed your livestock? Hyena Leopard Jackal Other:.....

c. How many livestock has been killed? Cows..... Goats..... Sheep.....

**MAELEZO YA KICHAA CHA MBWA**

35. Have you heard of any rabies incidence for the past 2 yrs in the village? Yes No

**Table L: Rabies Incidence**

| Species ya mnyama | Date of incident | Some description of incident if possible |
|-------------------|------------------|------------------------------------------|
|                   |                  |                                          |
|                   |                  |                                          |
|                   |                  |                                          |

36. Have you heard of any rabies incidence in humans in the past 5 yrs in the village? Yes No

**Table M: Human Rabies Incidence**

| Jina | Umri | Jinsi | Date | Clinical signs | Date of bite | Species biting | Died/ Recovered | If died, indicate date |
|------|------|-------|------|----------------|--------------|----------------|-----------------|------------------------|
|      |      |       |      |                |              |                |                 |                        |
|      |      |       |      |                |              |                |                 |                        |

37. Is there anybody in the household who was ever bitten by an animal? Ndiyo Hapana

**Table N: Human Bite Incidence**

| Jina | Mnyama<br>aliyemng'ata | Tarehe<br>aliyong'atwa | Clinical signs | Alipona/alikufa |
|------|------------------------|------------------------|----------------|-----------------|
|      |                        |                        |                |                 |
|      |                        |                        |                |                 |

38a. Do you know what rabies is?      Yes      No

b. If yes, please describe.....

39a. When was the last time you *heard* of a dog rabies case? .....

b. A human case?.....

40a. Have you ever actually personally *seen* a dog rabies case?      Yes      No

b. If yes, when and describe.....

c. A human case?      Yes      No

d. If yes, when and describe.....

41a. Do you feel your family is at risk for rabies?      Yes      No

b. Do you feel your dog is at risk for rabies?      Yes      No

c. If yes, why? .....

d. Do you feel your dog is at risk for getting sick with other diseases?      Yes      No

e. If yes, describe.....

42a. If a dog has rabies in this village, what happens to it?.....

b. If *your* dog has rabies, what do you do with it?.....

43a. control villages: Are you interested in vaccinating your dog for rabies?      Yes      No

a. vacc villages: Are you interested in continuing dog vaccinations?      Yes      No

b. Would you be willing to pay for dog vaccinations?      Yes      No

c. If yes, how much?.....

**ASANTE SANA!**
